# Supplementary material for: Dietary n-3 Polyunsaturated Fatty Acids (PUFA) Decrease Obesity-Associated Th17 Cell-Mediated Inflammation during Colitis
Source: PubMed Central journal article supplement (PMC3500317; doi:10.1371/journal.pone.0049739), 2012-11-16
Supplement: pone.0049739.s003.pdf [file pone.0049739.s003.pdf]

**Table S1. Semi-purified diet composition<sup>1</sup>**

| <b>Diet Constituent<br/>(g/kg diet)</b> | <b>HF</b> | <b>HF-FO</b> | <b>LF</b> |
|-----------------------------------------|-----------|--------------|-----------|
| Casein                                  | 200       | 200          | 200       |
| Methionine                              | 3         | 3            | 3         |
| Sucrose                                 | 338       | 338          | 338       |
| Corn Starch                             | 0         | 0            | 306       |
| Cellulose                               | 60        | 60           | 60        |
| AIN-76 Mineral Mix                      | 35        | 35           | 35        |
| Vitamin Mix                             | 13        | 13           | 13        |
| Choline Chloride                        | 2         | 2            | 2         |
| Lard                                    | 230       | 230          | 19        |
| Corn Oil                                | 119       | 33           | 24        |
| Fish Oil                                | 0         | 86           | 0         |

<sup>1</sup>All diet constituents were purchased from Bio Serv (Bio Serv, Frenchtown, NJ), except lard (ConAgra Foods, Omaha, NE) corn oil (Dyets, Madison, WI) and fish oil (Omega Protein Inc, Reedville, VA).
