# Supplementary material for: Dietary n-3 Polyunsaturated Fatty Acids (PUFA) Decrease Obesity-Associated Th17 Cell-Mediated Inflammation during Colitis
Source: PubMed Central journal article supplement (PMC3500317; doi:10.1371/journal.pone.0049739), 2012-11-16
Supplement: pone.0049739.s004.pdf [file pone.0049739.s004.pdf]

**Table S2. Colonic mucosal mRNA expression in vehicle control treated mice<sup>1</sup>**

| <b>Gene</b>         | <b>HF</b>      | <b>HF-FO</b>  | <b>LF</b>      | <b>P-value</b> |
|---------------------|----------------|---------------|----------------|----------------|
| ROR $\gamma$ $\tau$ | 1.9 $\pm$ 0.3  | 1.4 $\pm$ 0.1 | 1.1 $\pm$ 0.2  | 0.16           |
| T-bet               | 2.5 $\pm$ 0.2  | 2.7 $\pm$ 0.4 | 2.4 $\pm$ 0.9  | 0.62           |
| Foxp3               | 0.2 $\pm$ 0.02 | 0.5 $\pm$ 0.2 | 0.5 $\pm$ 0.3  | 0.39           |
| IL-6                | 0.6 $\pm$ 0.2  | 0.6 $\pm$ 0.2 | 0.6 $\pm$ 0.01 | 0.25           |
| IL-1 $\beta$        | 3.0 $\pm$ 1.3  | 3.4 $\pm$ 1.7 | 3.6 $\pm$ 1.7  | 0.96           |
| IL-17F              | 0.9 $\pm$ 0.2  | 0.5 $\pm$ 0.2 | 0.5 $\pm$ 0.3  | 0.21           |
| IL-21               | 0.42 $\pm$ 0.2 | 0.2 $\pm$ 0.1 | 0.2 $\pm$ 0.09 | 0.44           |
| IL-23               | 1.0 $\pm$ 0.1  | 1.6 $\pm$ 0.6 | 0.7 $\pm$ 0.07 | 0.29           |
| IL-27               | 4.2 $\pm$ 2.3  | 5.0 $\pm$ 1.9 | 8.6 $\pm$ 1.4  | 0.14           |
| IFN $\gamma$        | 0.3 $\pm$ 0.1  | 0.4 $\pm$ 0.1 | 0.8 $\pm$ 0.2  | 0.37           |
| IL-10               | 0.9 $\pm$ 0.2  | 1.2 $\pm$ 0.4 | 0.2 $\pm$ 0.03 | 0.33           |
| TGF- $\beta$ 1      | 3.3 $\pm$ 0.5  | 4.8 $\pm$ 0.9 | 3.9 $\pm$ 0.9  | 0.15           |

<sup>1</sup>Values are means  $\pm$  SEM (n=4-6/vehicle control mice/dietary group). Data were normalized to ribosomal 18S and analyzed by ANOVA. For all genes, the effect of diet is shown ( $P \leq 0.05$ ).
